# Supplementary material for: Functional redundancy of division specific penicillin‐binding proteins in Bacillus subtilis
Source: PubMed Central journal article supplement (PMC5656894; doi:10.1111/mmi.13765), 2017-08-29
Supplement: MMI-106-304-s001.pdf [file MMI-106-304-s001.pdf]

## **Supporting information data legend**

### **Fig. S1**

#### **Bio-informatic analysis of PBPs**

**A** - Alignment of the proposed active sites of HMT Class 1 PBPs that have defined active sites compared to PBP 2B, SpoVD and PBP 3 of *Bacillus subtilis*. The position of the active site serine residue for PBP 2B and PBP 3 is indicated at the top and bottom of the alignment.

**B** – Pairwise comparison of PBPs encoded in the *Bacillus* genome. Each box shows the percentage identity and similarity (in parenthesis) for that pair of PBPs along with the region of overlap (including gaps) analysed. The values are shown in red represent PBPs that show significant similarity (> 27.5 % identity) which in most cases, corresponds with PBPs known to have similar functions, if not functional redundancy e.g. PBP 2A and PBP H (Wei *et al.*, 2003) and PBP1, PBP 2C, PBP 4 and PBP G (Popham and Setlow, 1996).

### **Fig S2**

#### **Immunofluorescent detection of PBP 3 and PBP 2B**

**Panel A:** A Western blot image of total protein samples of vegetative 168 and 3105 cultures separated by SDS-PAGE using a polyclonal antiserum raised against full length PBP 3. The lanes from left to right correspond to samples of strain 168, and 3105 grown in PAB supplemented with various concentrations of xylose (0 - 0.5 %). The lower arrows corresponds to the position where wild-type PBP 3 would be expected to migrate and the upper arrow for a GFP-PBP 3 fusion.

**Panel B:** Characteristic images of cells stained for either PBP 3 or PBP 2B using polyclonal antisera that were used to derive “heat map” representations for the subcellular distribution of the PBPs in a cell population relative to cell length. Panels A and B show a typical cell staining patterns obtained for PBP 3 and PBP 2B respectively for the strains 168 and 4001 relative to cell morphology and DNA distribution.

### **Fig S3.**

#### **PBP profiles of strains with conditional expression of *pbpC*.**

**A** - Analysis of oxacillin sensitivity for strains with conditional expression of *pbpC*. Strains WT (168),  $\Delta$ *pbpC* (4015), KS51, KS53, KS52, KS55, 4001, KS51 and KS54 were spotted out as horizontal sequence corresponding to a 1:4 dilution series of the cultures on plates that were incubated for 16 h before being photographed. (A) Nutrient agar alone, (B) Nutrient agar with Oxacillin (0.04 $\mu$ g/ml) and (C) Nutrient agar with oxacillin (0.04  $\mu$ g/ml) and IPTG (1mM).

**B** - A fluorogram of an SDS-page gel showing the PBP profile of strains (168, 4001, 4015, KS50, KS51, KS53, KS54, KS52 and KS55 from left to right) sampled in mid-exponential growth in the presence or absence of IPTG (1 mM) and labelled with Bocillin-FL as described in the methods. The relevant genotype of each strain is shown above each lane of the gel. The arrows mark the location of bands corresponding to PBP 2B (1) and PBP 3 (2) that either change in intensity or are absent as expected for the genotype or growth conditions.

Fig. S4.

#### **Alignment of PBP 3, PBP 2B, PBP 2x, PBP 2A**

Alignment of PBP 3 to class B PBPs from *S. aureus* (PBP 2A), *B. subtilis* (PBP 2B), *S. pneumoniae* (PBP 2X) and *E. coli* (PBP 3) using Uniport database. Sequence similarity was highlighted in three colours blue, red and green ranging from low to high sequence similarity. The N-terminus of PBP 3, which consist of the Meca domain (residues 26-147), showed high similarity only to *Sa*PBP 2A, whereas the dimerization domain (residues 155-322) and the TPase domain (residues 352-666) of PBP 3 showed comparable similarity to all class B PBPs.

Fig. S5

**Both PBP 3 and SigM regulated genes act to confer  $\beta$ -lactam resistance.** To

determine the contributions of *sigM* and *pbpC* to resistance to cell wall synthesis inhibitors exponentially growing cultures of strains 168 (wild type), RD300 (*sigM*), 4015 (*pbpC*), RD301(*pbpC sigM*), and BSU2007 ( $\Delta 7$  ECF), were serially diluted and spotted onto plates containing moenomycin (A; 8  $\mu\text{g/ml}$ ), Penicillin G (B; 0.005  $\mu\text{g/ml}$ ), Cephalexin (C; 0.08  $\mu\text{g/ml}$ ), Oxacillin (D; 0.04  $\mu\text{g/ml}$ ), and no antibiotic (E). Plates were then incubated at 37 °C for 18 h prior to being photographed

Fig. S1

A

S309 - PBP 2B  
∨

[gi\\_239938676](#) FDPNKRDVNTNYNDLISYAYEPGSTMKIIFTLAAAMQENVFNANEKYKSGTFEVLGGAPV Pbp2B  
[gi\\_239938848](#) DYQSVDPVYNRNLPVWVSTYEPGSTFKIITLAAALEEQKVNLKRDQFYDKGHAQVDGA SpoVD  
 2Z2M E TKEGITEDEFVWRDILYQSNIYEPGSTMKVMMLAAAIDNNTFPGGEVFNSSSELKIADATI Pbp2x *S. pneum*  
[gi\\_75504447](#) PETGKDFGKKWANDLYQNTYEPGSTFKSYGLAAAIQEGAFDPDKKYKSGHRDIMGSRI Pbp1 *S. aureus*  
[gi\\_83287821](#) NNLSGTFKEAMRNRTITDVFEPGSTVKPMVMTALQRGVVRENSVLNTIPYRINGHEI FtsI *E. coli*  
[gi\\_129676](#) YNKLTEDKKEPLLNKFQITTS PGSTQKILTAMIGLNNKTLDDKTSYKIDGKGVQKDKS MecA *S aureus*  
[gi\\_1175719](#) WKLNKDKNNPFSAKFNKTYAPGSTIKPI AAAIGIKNGTLKADEKKTIKGKEWQKD PbpC

^  
S410 - PBP 3

B

|                       |                      |                      |                      |                      |                      |                      |                      |               |                      |                      |                      |              |              |  |  |  |  |  |  |  |  |  |  |
|-----------------------|----------------------|----------------------|----------------------|----------------------|----------------------|----------------------|----------------------|---------------|----------------------|----------------------|----------------------|--------------|--------------|--|--|--|--|--|--|--|--|--|--|
| <b>PBP protein</b>    |                      |                      |                      |                      |                      |                      |                      |               |                      |                      |                      |              |              |  |  |  |  |  |  |  |  |  |  |
| <b>PBP 1A (914aa)</b> | <b>PBP 1A</b>        |                      |                      |                      |                      |                      |                      |               |                      |                      |                      |              |              |  |  |  |  |  |  |  |  |  |  |
| <b>PBP 2A (713aa)</b> | 25.1% (53.3%)<br>375 | <b>PBP 2A</b>        |                      |                      |                      |                      |                      |               |                      |                      |                      |              |              |  |  |  |  |  |  |  |  |  |  |
| <b>PBP 2B (716aa)</b> | 24.1% (54.8%)<br>294 | 24.3% (54.0%)<br>643 | <b>PBP 2B</b>        |                      |                      |                      |                      |               |                      |                      |                      |              |              |  |  |  |  |  |  |  |  |  |  |
| <b>PBP H (685aa)</b>  | -                    | 42.8% (74.7%)<br>703 | 23.8% (53.4%)<br>562 | <b>PBP H</b>         |                      |                      |                      |               |                      |                      |                      |              |              |  |  |  |  |  |  |  |  |  |  |
| <b>PBP 2C (714aa)</b> | 33.2% (65.2%)<br>742 | -                    | -                    | -                    | <b>PBP 2C</b>        |                      |                      |               |                      |                      |                      |              |              |  |  |  |  |  |  |  |  |  |  |
| <b>PBP 3 (668aa)</b>  | -                    | 24.4% (54.8%)<br>610 | 27.2% (54.9%)<br>541 | -                    | 26.9% (51.6%)<br>335 | <b>PBP 3</b>         |                      |               |                      |                      |                      |              |              |  |  |  |  |  |  |  |  |  |  |
| <b>PBP 4 (624aa)</b>  | 31.8% (64.0%)<br>606 | -                    | -                    | -                    | 33.5% (64.4%)<br>576 | 24.6% (50.8%)<br>382 | <b>PBP 4</b>         |               |                      |                      |                      |              |              |  |  |  |  |  |  |  |  |  |  |
| <b>PBP 4* (451aa)</b> | -                    | -                    | -                    | -                    | -                    | 27.0% (51.3%)<br>337 | -                    | <b>PBP 4*</b> |                      |                      |                      |              |              |  |  |  |  |  |  |  |  |  |  |
| <b>PBP G (647aa)</b>  | 31.7% (63.3%)<br>665 | -                    | 24.3% (54.2%)<br>354 | 22.8% (49.7%)<br>382 | 33.8% (66.2%)<br>625 | 23.0% (51.8%)<br>330 | 30.0% (62.5%)<br>594 | -             | <b>PBP G</b>         |                      |                      |              |              |  |  |  |  |  |  |  |  |  |  |
| <b>SpoVD (645aa)</b>  | -                    | 27.2% (54.2%)<br>570 | 33.9% (63.7%)<br>641 | 26.5% (56.6%)<br>449 | -                    | 27.7% (55.9%)<br>538 | 23.4% (50.6%)<br>427 | -             | -                    | 22.5% (51.2%)<br>365 | <b>SpoVD</b>         |              |              |  |  |  |  |  |  |  |  |  |  |
| <b>PBP I (584aa)</b>  | 25.4% (53.2%)<br>327 | 22.1% (56.6%)<br>516 | 24.2% (55.5%)<br>591 | 25.0% (55.1%)<br>508 | 22.8% (51.8%)<br>556 | 23.2% (53.5%)<br>565 | -                    | -             | -                    | -                    | 27.9% (55.3%)<br>591 | <b>PBP I</b> |              |  |  |  |  |  |  |  |  |  |  |
| <b>PBP X (391aa)</b>  | -                    | -                    | -                    | -                    | -                    | -                    | -                    | -             | 31.3% (59.9%)<br>319 | -                    | -                    | -            | <b>PBP X</b> |  |  |  |  |  |  |  |  |  |  |

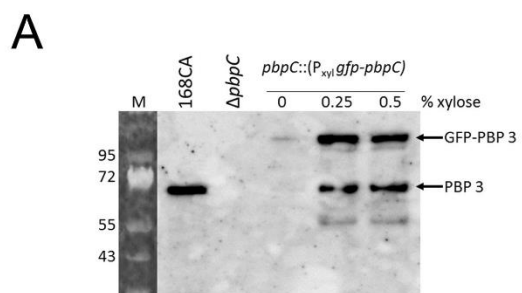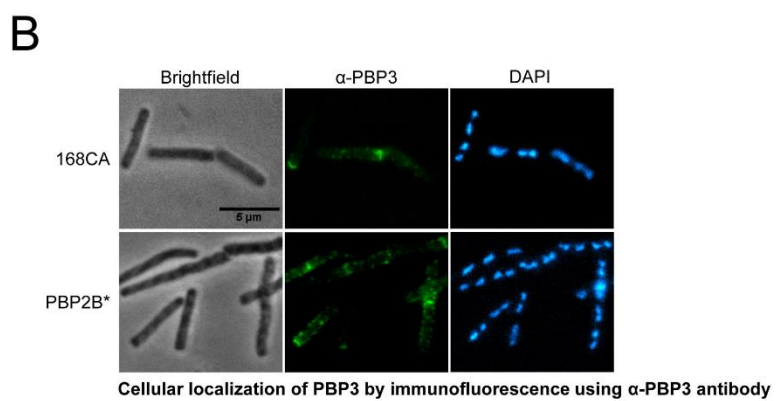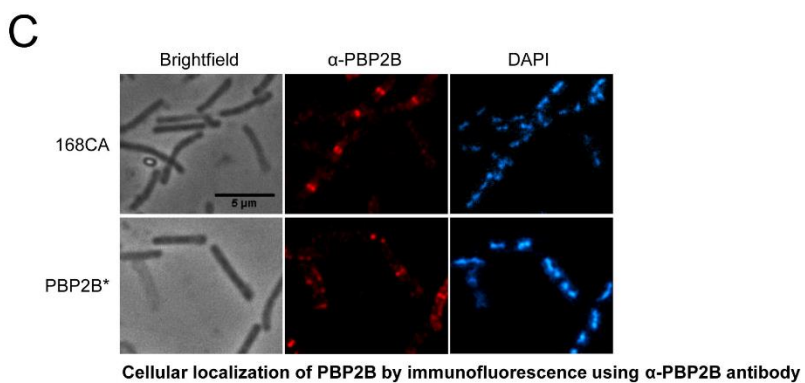

Fig S2

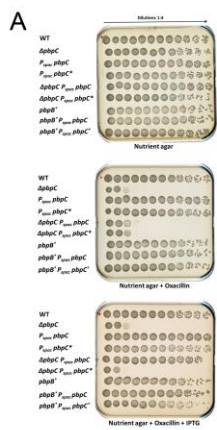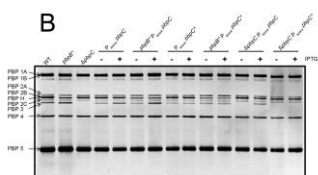

PBPC\_BACSU MLKKCI---LLVFLCVGLIGLIGCSKTDSPEDRMEAFVKQWNDQQFDDMYQSLTKDVKKE 57  
 O54286\_STAAU MKKIKIIVPLILIVVVVGFGIYFYA---SKDKEINNTIDATEDKNFKQVYKDSYISKSD 56  
 PBPB\_BACSU -----  
 PBPX\_STRR6 -----  
 FTSI\_ECOLI -----

PBPC\_BACSU ISKKDFVNRKYKAIYEQAGVKNLKVTAGEVDDKDDQDNKTMKHIPYKVMNTNAGKVSFKNT 117  
 O54286\_STAAU NGEVEMTERPIKIYNSLGVKDINIQDRKIKKVSKNKKR-VDAQYKI--KTNYGNID---- 109  
 PBPB\_BACSU -----MIQMPKKNK-----F---MN--RGAAILSIC 21  
 PBPX\_STRR6 -----MKWTKRVIYATKNR----KSPA---ENRRRVGKSLSL 32  
 FTSI\_ECOLI -----MKAAAKT-QKPKRQE---HANF---IS--WRFALLCGC 30

PBPC\_BACSU AVLKLEKTDDEESWNIDWPS--FIFKQLADDKTVQIMSIEPKRGQIYDKNGKGLAVNTD 175  
 O54286\_STAAU RNVQNFVVKEDGMWKLWDHS--VIIPGMQKQSIHIENLKSERKTLDRNNVELANTGT 167  
 PBPB\_BACSU FALFFVILGRMAYIQITGKANGEVLA TKATEQHEKKRTIEASRGSILDRKGKVI AEDTA 81  
 PBPX\_STRR6 SVFVFAIFLVNFVAVIIGTGTRFGTDLAKEAKKVHTTRTPVPAKRGTYDRNGVPIAEDAT 92  
 FTSI\_ECOLI ILLALAFLLGRVAWLQVISP---DMLVKEGDMRSLRVQQVSTSRGMTDRSGRPLAVSVP 87

PBPC\_BACSU VPEIGIVPGEL-----GDKKEKVIKELAKKLDLTEDDIKKLDQGWVKDDSFV 223  
 O54286\_STAAU AYEIGIVPKNV-----SKKD---YKAIKAKELSI SEDYIKQMDQNWVQDDTFV 212  
 PBPB\_BACSU TYKLIAILDKKMTTDDVKHPQHVV--NKEKTAEALSKVINLDKADILD-ILNKDAKQVEFG 138  
 PBPX\_STRR6 SYNVAVIDENYKSATGKILYVEKTFQNKVAEVFHKYLDMEESYVREQLSQPNLKQVSFG 152  
 FTSI\_ECOLI VKATWADPKEV--HDAGGISV--GDRWKALANALNIPLD-----QLS----ARINAN 131

PBPC\_BACSU PLKKV-----KPDQEKLVSEATSLQGVTRTNVSSRYYPYGEKTAHLTG YVRAITAEELK 277  
 O54286\_STAAU PLKTV-----KKMDEYLSDFAK-KFHITNETESRNYPLEKATSHL LGYVGPINSEELK 265  
 PBPB\_BACSU SAGRDIYSQK-----QKIEKMKLPGISFLRDTKRYYPNGVFASNLIGYAEVDEE---- 188  
 PBPX\_STRR6 AKNGITYANM--MSIKKELEAAEVKGI DFTTSPNRSYPNGQFASFI GLAQLHEN---- 206  
 FTSI\_ECOLI PKGRFIYLARQVNPDMADYIKKLLKLPGLHLREESRRYYPSEGEVTAHLIGFTNVDS---- 186

PBPC\_BACSU KKKEGTYSDTSNIGIAGLENVYEDKLRGTTGWKIYVPQT-----GEVI-AEKKAKDGEDL 331  
 O54286\_STAAU QKEYKGYKDDAVIGKKGLEKLYDKKLQHEDGYRVTIVDDNSNTIAHTL-IEKKKDKGDI 324  
 PBPB\_BACSU -----T---NEISGAMGLEKVLDKYLKERDGYVTYESDKSGWELPNSKNKITAPKNGDNV 240  
 PBPX\_STRR6 -----EDGSKSLGTSGMESLNSILAGTDGIITYEKDRLGNIVPGTEQVSQRTMDGKDV 261  
 FTSI\_ECOLI -----QGIEGVEKSFDKWLTGQFGERIVRKDRYGRVIEDISS--TDSQA AHNL 232

PBPC\_BACSU HLTIDIKTQMKLYDELK-----DMSGAAVALQPKTGETLALV SAPSYDPNGFIFGWS 384  
 O54286\_STAAU QLTIIDAKVQKSIYNNMK-----NDYGSGTAIHPQTGELLALVSTPSYDVYPFMYGMSN 377  
 PBPB\_BACSU YLTIIDQKIQTFLSDMTKVAQYNPKKIMAAVDPKTGKVLAMGQRPSFDPNKRDVT--- 297  
 PBPX\_STRR6 YTTISSPLQSFMETQMDAFQEKVKGYMTATLVSAKTGEILATTQRP TFDADTKEGIT 321  
 FTSI\_ECOLI ALSIDERLQALVYRELNNAVAFNKAESGSAVLVDVNTGEVLAMANSYSPYNNLSGTPKE 292

PBPC\_BACSU KEWKKLNKDKNNPFSAKFNKTYAPGSTIKPIAAAI GIKNGTLKADEKKT-----IK---G 436  
 O54286\_STAAU EEYNKLTEDKKEPLLNFQITTSFGSTQKILITAMIGLNNKTLDDKTSYK-----ID---G 429  
 PBPB\_BACSU -NYY-----NDLISYAYEFGSTMKIFTLAAAMQENVFANANEKYKSGTFE VGGAPV 346  
 PBPX\_STRR6 FVWR-----DILYQSNYEFGSTMKVMMMLAAIDNNTFPGGEVFNSSSELKIADATI 371  
 FTSI\_ECOLI -AMR-----NRTITDVFEFGSTVKPMVMTALQRGVVRENSVLNTIPYRINGHEI 341

```

PBPC_BACSU      KEWQKDSWGGYSVTRVSRERLQQVDLENALITSDNIFYAQNAL-DMGADTFTKGLKTECF 495
O54286_STAAU   KGWQKDKSWGGYNVTRYEVVNGNIDLKQATIESDNIFFARVAL-ELGSKKFEKGMKKLCV 488
PBPB_BACSU      KDHNNGVGVW---GPT-----TYHDGVLRSNVAFAKLAKEKLYDRLNQYLHKFN 394
PBPX_STRR6     RDWDVNEGLTGGRMM-----TFSQGFHSSNVGMT-LLEQKMGDATWLDYLNRFK 421
FTSI_ECOLI     KDVARISEL-----TLTGVLQKSSNVGVSKLAL-AMPSSALVDYTSRFGL 385

PBPC_BACSU      SEDVPYEFPIQK-SSIANDKLDSDILLADTGYGQGMQMSPLHLATAYTPFVNDGLVK 554
O54286_STAAU   GEDIPSDYPFYN-AQISNKNLDNEILLADS GYGQGEILINPVQILSIYSALENNGNINAF 547
PBPB_BACSU      YQKTGIDLPGEVSSKINFKYE---FDKASTAYGOASA-VTPIQQIQAATAIANDGKMMKF 450
PBPX_STRR6     GVPTRFGLTDEYAGQLPADNI---VNI AQSSFGQGIS-VTQTQMIRAFTAIANDGVMLEP 477
FTSI_ECOLI     GKATNLGLVGERSGLYPQQRWSDIERATFSFGYGLM-VTPLQLARVYATIGSYGIY-R 443

PBPC_BACSU      TLIKKDSQTADVWH-----KQVVTKEGAADITKG-----LKGVVEDERGSAY 596
O54286_STAAU   HLLKDT--KNKVWK-----KNIISKENINLLTDG-----MQQVVKTHKEDI 587
PBPB_BACSU      YVIDHIVDPDKDKTIYQNKPEAGTPIASASTAKKVRDI-----LGEVVTISKIGTGQ 501
PBPX_STRR6     KFSAIYDPNDQTAR-KSQKEIVGNPVSKDAASLTRTNMVLVGTDPVYGTMYNHST-GKP 535
FTSI_ECOLI     LSTTKVDPVPV-----PGERVFP--ESIVRTVVHM-----MESVALPGGGGV 482

PBPC_BACSU      QPVVKGITVAGKTGTAEELKTSKDDKDGTEG----WFVG-YDYENKDLLVAMTIQNVQDR 651
O54286_STAAU   YR--SYANLIGKSGTAEELKMK-QGETGRQIG----WFIS-YDKDNPMMMAINVKDVQDK 639
PBPB_BACSU      AYKIEGFDVAGKTGTAQIA--GKGGYLDGTDNYIFSFMGMAPKDDPELLIYVAVQQPQLK 559
PBPX_STRR6     TVTVPGQNVALKSGTAQIADEKNGGYLVGLTDYIFSASMSPAENPDFILYVTVQQPEHY 595
FTSI_ECOLI     KAAIKGYRIAIAIKGTAKKVG-PDGRY---INKYIAYTAGVAPASQPRFALVVVINDPQAG 538

PBPC_BACSU      GGSYVVEKAKKQFQSN----- 668
O54286_STAAU   GMASYNAKISGKVYDEL--YENGKKYDIDE----- 668
PBPB_BACSU      AGQSSS-DPVSEIFNP--TMKNSLHYLNIEPTEKSDSDKEETKAQTMPDLTDQTVAAAQK 616
PBPX_STRR6     SGIQLG-EFANPILERASAMKDS---LNLQTTAKALEQVSQQSPYPMPSVKDISPGDLAE 651
FTSI_ECOLI     KYY-GG-AVSAPVFGA--IMGGVLRMTNIEPDALTGDKNEFVINQEGGTGGRS----- 588

PBPC_BACSU      -----
O54286_STAAU   -----
PBPB_BACSU      KAKEENLTPIVIGSDVAVKEQYPKADEEVLTNQKVFLKTGGKIKMPDMTGWSRREVLYG 676
PBPX_STRR6     ELRRNLVQPIVVGTTGKIKNSSAEEGKNLAPNQVLLILSDKAEVPMYGTWTKETAETLA 711
FTSI_ECOLI     -----

PBPC_BACSU      -----
O54286_STAAU   -----
PBPB_BACSU      ELAGIHIEVSGQGYAVSQS-VKKDKEIKDKTVIKVKFNPD 716
PBPX_STRR6     KWLNIELEFQSGSSTVQKQDVRANTAIKDIKKITLTLGD-- 750
FTSI_ECOLI     -----

```

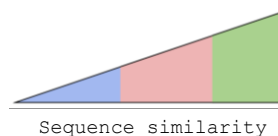

Fig S4



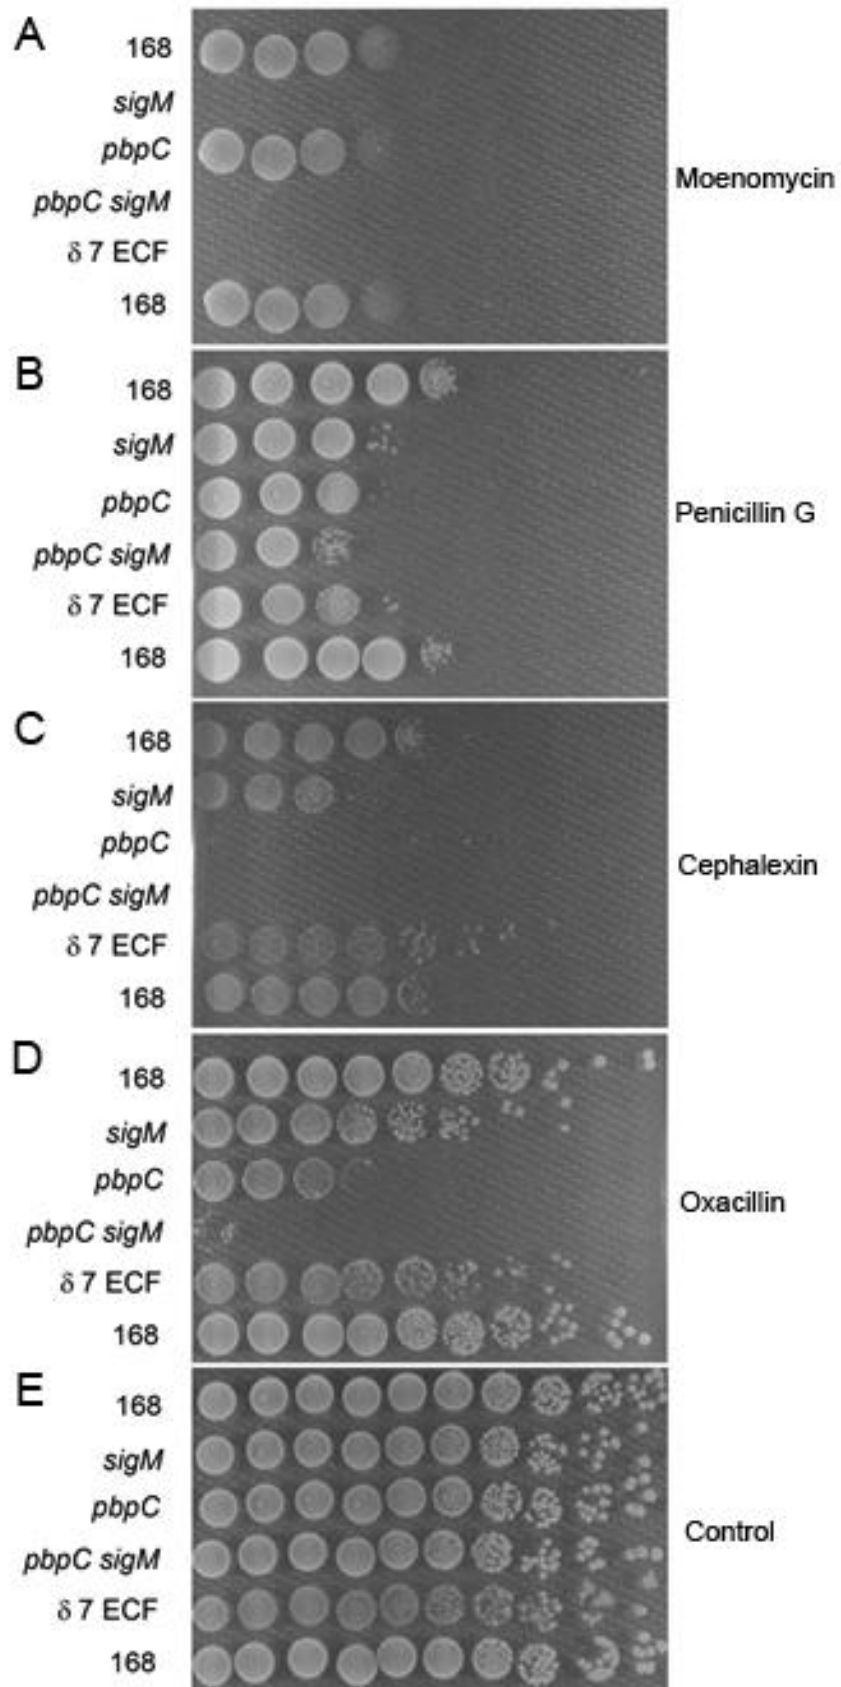

Fig S5
